# Supplementary material for: Elamipretide Improves Mitochondrial Function in the Failing Human Heart
Source: PubMed Central journal article supplement — JACC Basic Transl Sci. 2019 Apr 29;4(2):147–57. doi: 10.1016/j.jacbts.2018.12.005 (PMC6488757; doi:10.1016/j.jacbts.2018.12.005), 2019-04-29

## Online Supplemental Data

### *Preservation of mitochondrial function in explanted fresh hearts*

To test the preservation of mitochondrial function in BIOPS over time, freshly explanted nonfailing heart tissue was kept in BIOPS at 4°C, with respirometry experiments performed on the day of explant and 3 days later. Online Figure 1 A-C shows respirometry in nonfailing tissue with additions of pyruvate, malate plus ADP, glutamate (CI), and succinate (CI+CII). No statistical difference in oxygen flux was observed with all substrates and inhibitors, (including those not shown) during this 3-day period. After 7 days in BIOPS, there were still no significant differences in oxygen flux compared to 0-day values (data not shown). When HF samples were tested on the day of explant and 3 days after explant, however, oxygen flux was significantly higher at the latter time point (Online Fig. 1D-F). Based on this finding, all high resolution respirometry experiments were initiated within 6 hours of explant.

### *Elamipretide restores mitochondrial oxygen flux in failing human heart*

Representative traces from saponin permeabilized HF fibers of one patient are shown in Figure 2 where the top tracing (Online Fig. 2A) is from untreated fibers and the bottom tracing (Online Fig. 2B) from fibers incubated in elamipretide. Elamipretide treatment seemed to increase the rate of mass-corrected oxygen flux (shown by the thick red line) compared to untreated fibers, especially with the addition of ADP and glutamate.

### *Derivation of Supercomplex Coupling Control Ratio and Respiratory Control Ratio:*

Two mathematical constructs used in respirometry analysis are the coupling control factor ratio for the mitochondrial supercomplex (SC CCF) and the respiratory control ratio (RCR).

$$SC\ CCF = \frac{glut}{succ - glut} = \frac{CI}{C(I + II) - CI}$$

$$RCR = \frac{ADP}{PM},$$

where *glut*, *succ* and *ADP* are the oxygen fluxes after the addition of glutamate, succinate, and ADP respectively, *PM* is the flux after the addition of pyruvate and malate. The SC CCF is the inverse expression of the contribution of CII, which is not in the supercomplex, compared to the contribution of CI+CII supported oxidative phosphorylation. The RCR is directly proportional to the level of mitochondrial coupling between respiration and phosphorylation.

### **Online Figure Legends**

Online Figure 1 Mitochondria Functional Preservation with BIOPS. Cardiac tissue was preserved in BIOPS bio preservation solution for up to 3 days and high resolution respirometry performed to determine the effect of incubation time on mitochondrial function. (A-C) Nonfailing hearts treated with (A) pyruvate, malate plus ADP; (B) subsequent addition of glutamate acting through CI; (C) subsequent addition of succinate additionally activating CII either measured on Day 0 or Day 3. (D-F) Failing heart under the same conditions as the first three panels. N=4-5/group. ADP, adenosine diphosphate; C, complex; O<sub>2</sub>, oxygen.

Online Figure 2 **High Resolution Respirometry Traces.** Respirometry of an (A) untreated, and (B) elamipretide treated permeabilized fiber samples from a failing heart. Thin blue line is oxygen concentration and thick red line is oxygen flux. Stepwise additions to the chamber are shown in boxes between traces. For concentrations of additions, see Methods. ADP, adenosine diphosphate; FCCP, Carbonyl cyanide-*p*-trifluoromethoxyphenylhydrazine; HF, heart failure; O<sub>2</sub>, oxygen.

Online Figure 3 **High Resolution Respirometry of Treated and Untreated Heart Fibers through Complex II .** Oxygen flux normalized to mass in permeabilized heart fibers from untreated failing (HF) vs nonfailing (NF) human hearts with addition of rotenone following additions of malate, pyruvate, ADP, glutamate, succinate and FCCP (see methods for concentrations). (A) There was no significant difference between flux through CII in untreated nonfailing vs. failing hearts. Elamipretide treatment had no effect on oxygen flux through CII of nonfailing (B) or failing (C) samples. Untreated hearts in B and C are shown with closed circles and treated hearts with open circles; n=5 nonfailing, n=16 failing.

**Supplemental Table 1 Patient Data for Experiments involving Fresh Tissue**

| <b>Failure Status*</b> | <b>Age</b> | <b>Sex</b> | <b>Diagnosis</b>   | <b>EF [FS]</b> | <b>Inotrope</b> | <b>Milrinone</b> | <b>Digoxin</b> | <b>ACE-I</b> | <b>BB</b> | <b>Diuretic</b> | <b>Other Medications</b> | <b>Experiment</b> |
|------------------------|------------|------------|--------------------|----------------|-----------------|------------------|----------------|--------------|-----------|-----------------|--------------------------|-------------------|
| NF                     | 0.04       | M          | HLHS               | NL             | N               | N                | N              | Y            | N         | Y               |                          | O,E               |
| NF                     | 0.05       | F          | PA/IVS             | [32]           | N               | N                | N              | N            | N         | Y               | ASA,PGE                  | O,C,E             |
| NF                     | 0.17       | F          | PA/IVS             | [32]           | Y               | N                | N              | N            | N         | Y               | VP, PGE                  | O,C,E             |
| NF                     | 0.25       | M          | HCM                | 67             | N               | N                | N              | N            | Y         | N               | AA                       | O,E               |
| NF                     | 4.7        | F          | RCM                | 63             | N               | N                | N              | N            | N         | Y               | ASA                      | E                 |
| NF                     | 7          | M          | HLHS,<br>PLE       | NL             | N               | N                | N              | N            | Y         | N               | PDE5i, ASA               | O,E               |
| NF                     | 10         | F          | TGA,<br>VSDs, PLE  | NL             | N               | Y                | N              | N            | N         | Y               | PDE5i                    | O,E               |
| NF                     | 25         | M          | Donor              | 56             | NA              | NA               | NA             | NA           | N<br>A    | NA              |                          | O,C,E             |
| NF                     | 26         | M          | Donor              | NA             | NA              | NA               | NA             | NA           | N<br>A    | NA              |                          | O                 |
| NF                     | 52         | F          | Donor              | 55             | NA              | NA               | NA             | NA           | N<br>A    | NA              |                          | O,E               |
| NF                     | 53         | M          | Donor              | NA             | NA              | NA               | NA             | NA           | N<br>A    | NA              |                          | O,C               |
| NF                     | 58         | F          | Donor              | 80             | NA              | NA               | NA             | NA           | N<br>A    | NA              |                          | O,E               |
| NF                     | 62         | F          | Donor              | 65             | NA              | NA               | NA             | NA           | N<br>A    | NA              |                          | E                 |
| NF                     | 63         | F          | Donor              | 60             | Y               | N                | N              | N            | N         | N               | VP                       | O,C               |
| HF                     | 0.11       | F          | DCM                | 11             | N               | Y                | N              | N            | N         | Y               | PGE, MCRA                | C                 |
| HF                     | 0.2        | F          | MS s/p<br>MVR x 2  | 31             | N               | Y                | N              | N            | N         | Y               | ASA                      | O,E               |
| HF                     | 0.2        | M          | HLHS               | Sv             | N               | Y                | Y              | N            | N         | Y               | ASA                      | O                 |
| HF                     | 0.5        | F          | HLHS/TA<br>PVR s/p | M/S            | N               | Y                | N              | N            | N         | Y               | PDE5i,MCR<br>A           | O,E               |

|    |     |   |                       |                |    |    |    |    |        |    |                    |       |
|----|-----|---|-----------------------|----------------|----|----|----|----|--------|----|--------------------|-------|
|    |     |   | Nw                    |                |    |    |    |    |        |    |                    |       |
| HF | 0.6 | M | MS/AS                 | mild           | N  | Y  | N  | N  | N      | Y  |                    | O,C   |
| HF | 1.5 | M | TGA                   | 30             | N  | Y  | N  | N  | N      | Y  | MCRA, ASA          | O,C,E |
| HF | 4   | F | TGA/VSD               | 23             | N  | Y  | N  | N  | N      | Y  | MCRA, ASA          | O,C   |
| HF | 14  | F | DCM                   | 22             | Y  | Y  | N  | N  | N      | Y  |                    | E     |
| HF | 14  | F | DCM                   | VA<br>D/22     | Y  | Y  | N  | N  | N      | Y  | PDE5i,CCB,<br>VP   | E     |
| HF | 16  | F | DCM                   | VA<br>D/N<br>A | N  | N  | N  | Y  | N      | Y  | CCB, ASA           | O,E   |
| HF | 18  | M | DCM                   | 37             | N  | Y  | Y  | Y  | Y      | Y  | VASODIL            | O     |
| HF | 18  | M | DCM                   | [11]           | N  | N  | N  | N  | N      | Y  | PDE5i,MCR<br>A,ASA | O,E   |
| HF | 18  | M | TV                    | [25]           | N  | Y  | N  | N  | N      | Y  |                    | O,C   |
| HF | 20  | F | DCM                   | 17             | Y  | Y  | N  | N  | N      | Y  | MCRA,VAS<br>ODIL   | O     |
| HF | 32  | M | DCM                   | 29             | N  | Y  | N  | N  | N      | Y  | MCRA               | O     |
| HF | 33  | M | DCM                   | [14]           | N  | N  | N  | Y  | N      | Y  | MCRA,CCB,<br>ASA   | O     |
| HF | 43  | F | ARVC                  | **             | NA | NA | NA | NA | N<br>A | NA |                    | O,C   |
| HF | 44  | M | ARVC                  | **             | NA | NA | NA | NA | N<br>A | NA | AA                 | O,C   |
| HF | 47  | M | DCM<br>Becker's<br>MD | 39             | N  | N  | Y  | N  | N      | N  | MCRA               | E     |
| HF | 47  | M | DCM                   | 30             | N  | Y  | N  | N  | N      | Y  | VASODIL            | O     |
| HF | 53  | M | ARVC                  | 27             | N  | N  | N  | N  | Y      | N  | MCRA,AA            | C     |
| HF | 55  | M | Sarcoidosis           | 22             | N  | N  | N  | N  | Y      | N  | MCRA,AA            | E     |
| HF | 58  | M | ICM                   | 20             | Y  | N  | Y  | N  | N      | Y  | MCRA,<br>VASODIL   | E     |
| HF | 60  | M | Sarcoidosis           | Sv             | N  | N  | N  | Y  | N      | N  | STAT,AA,CC         | E     |

|    |    |   |      |    |   |   |   |   |   |   |                               |     |
|----|----|---|------|----|---|---|---|---|---|---|-------------------------------|-----|
|    |    |   |      |    |   |   |   |   |   |   | B                             |     |
| HF | 60 | F | DCM  | 6  | Y | N | N | N | N | N | MCRA,<br>VASODIL              | O   |
| HF | 61 | M | ICM  | 21 | N | N | Y | N | N | Y | MCRA,VAS<br>ODIL,ASA          | O   |
| HF | 62 | M | ICM  | 15 | Y | Y | N | N | N | Y | AA, ASA                       | O,C |
| HF | 65 | M | ICM  | 27 | N | N | N | N | N | Y | MCRA,STAT<br>,VASODIL,A<br>SA | O   |
| HF | 66 | M | ARVC | 28 | Y | N | N | Y | N | Y | MCRA                          | O   |
| HF | 67 | M | DCM  | 15 | Y | N | Y | N | N | Y | MCRA,VAS<br>ODIL              | C   |
| HF | 68 | M | DCM  | 21 | N | N | Y | N | Y | Y | MCRA                          | E   |
| HF | 71 | M | ICM  | 22 | Y | N | Y | N | N | N | MCRA,STAT                     | O   |

*\*Abbreviations for Failure Status column:* NF, nonfailing; HF, heart failure.

*Abbreviations for Sex column:* M, male; F, female

*Abbreviations for Diagnosis column:* ARVC, arrhythmogenic right ventricular cardiomyopathy; AS, aortic stenosis; DCM, dilated cardiomyopathy; HCM, hypertrophic cardiomyopathy; HLHS, hyperplastic left heart syndrome; ICM, ischemic cardiomyopathy; MD, muscular dystrophy; MS, mitral stenosis; MVR, mitral valve replacement; Nw, Norwood; PA/IVS, pulmonary atresia with intact ventricular septum; PLE, transplanted secondary to refractory protein losing enteropathy; RCM, restrictive cardiomyopathy; RV, right ventricle; s/p, status post; Sv RVF, severe right ventricular failure; TAPVR, total anomalous pulmonary venous return; TGA, transposition of the great arteries; TV, transplant vasculopathy; VSD, ventricular septal defect.

*Abbreviations for EF [FS] column:* EF, ejection fraction (%); FS, fractional shortening (%) shown in brackets; M/S, moderate to severe; NA, not available; NL, normal; Sv, severe; VAD, ventricular assist device; \*\*Class IV symptoms with low cardiac output/ cardiac index by right heart catheterization.

*Abbreviations for Medications columns:* AA, anti-arrhythmic; ACE-I, angiotensin converting enzyme inhibitor; ASA, aspirin; BB, beta blocker; CCB, calcium channel blocker; MCRA, mineralocorticoid receptor antagonist; N, not taking medication; NA, not

available; PDE5i, phosphodiesterase 5 inhibitor; PGE, prostaglandin E; STAT, statin; VASODIL, vasodilator; VP, vasopressin; Y, taking medication.

*Abbreviations for Experiment column:* C, cardiolipin study; E, enzyme study; O, Oroboros O2K study.

**Supplemental Table 2 Patient Data for Experiments involving Frozen Tissue for BN-PAGE**

| <b>Failure Status*</b> | <b>Age</b> | <b>Sex</b> | <b>Diagnosis</b> | <b>EF [FS]</b> | <b>Inotrope</b> | <b>Milrinone</b> | <b>Digoxin</b> | <b>ACE-I</b> | <b>BB</b> | <b>Diuretic</b> | <b>Other Medications</b>         |
|------------------------|------------|------------|------------------|----------------|-----------------|------------------|----------------|--------------|-----------|-----------------|----------------------------------|
| NF                     | 1.3        | F          | Donor            | 49             | Y               | N                | N              | N            | N         | N               | VP                               |
| NF                     | 3          | M          | Donor            | NA             | Y               | N                | N              | N            | N         | N               | VP                               |
| NF                     | 3          | F          | Donor            | NA             | Y               | N                | N              | N            | N         | N               | VP, DDAVP                        |
| NF                     | 7          | M          | Donor            | NA             | Y               | N                | N              | N            | N         | N               | DDAVP, T4                        |
| NF                     | 8          | F          | Donor            | NA             | N               | N                | N              | N            | N         | N               |                                  |
| NF                     | 9          | F          | Donor            | NA             | Y               | N                | N              | N            | N         | Y               | VASOPR,<br>DDAVP, T4,<br>VASODIL |
| NF                     | 9          | M          | Donor            | NA             | N               | N                | N              | N            | N         | N               | DDAVP, T4                        |
| NF                     | 10         | M          | Donor            | NA             | Y               | N                | N              | N            | Y         | N               | VP                               |
| NF                     | 14         | M          | Donor            | NA             | Y               | N                | N              | N            | Y         | N               | T4, DDAVP,<br>VASODIL            |
| NF                     | 17         | F          | Donor            | 60             | N               | N                | N              | N            | N         | N               |                                  |
| NF                     | 23         | F          | Donor            | NA             | Y               | N                | N              | N            | N         | N               | VP                               |
| NF                     | 30         | M          | Donor            | mild           | Y               | N                | N              | N            | N         | Y               | T4                               |
| NF                     | 35         | F          | Donor            | 67             | Y               | N                | N              | N            | Y         | Y               | T4                               |
| NF                     | 48         | F          | Donor            | >55            | N               | N                | N              | N            | N         | N               | VASOPR,<br>T4                    |
| NF                     | 51         | F          | Donor            | 60             | Y               | N                | N              | N            | Y         | Y               | VASODIL,<br>CCB,<br>DDAVP        |
| NF                     | 53         | M          | Donor            | 70             | Y               | N                | N              | N            | N         | N               | VP, PGE                          |
| NF                     | 56         | F          | Donor            | NA             | N               | N                | N              | N            | N         | Y               | T4                               |



|    |     |   |       |            |   |   |   |   |   |   |                            |
|----|-----|---|-------|------------|---|---|---|---|---|---|----------------------------|
| NF | 61  | M | Donor | 61         | Y | N | N | N | N | Y | VP, STAT,<br>VASOPR        |
| NF | 62  | F | Donor | NA         | Y | N | N | N | N | N | VP,<br>VASOPR              |
| HF | 0.5 | F | DCM   | 20         | N | Y | N | N | Y | Y | AA, ASA,<br>MCRA           |
| HF | 0.6 | M | DCM   | VAD/<br>NA | Y | Y | N | N | N | Y | PDE5i, ASA,<br>AA          |
| HF | 0.7 | F | DCM   | 20         | N | Y | Y | N | N | Y | MCRA, AA                   |
| HF | 3   | F | DCM   | 41         | N | Y | N | Y | N | Y | ASA,<br>MCRA, T4           |
| HF | 3   | M | DCM   | 14         | N | Y | Y | Y | N | Y | AA, ASA                    |
| HF | 4   | F | DCM   | 28         | N | Y | N | Y | N | Y | ASA                        |
| HF | 4   | F | DCM   | 27         | N | Y | Y | Y | Y | Y | ASA                        |
| HF | 5   | M | DCM   | [16]       | N | N | N | N | Y | Y | PDE5i, AA.<br>ASA          |
| HF | 5   | M | DCM   | [4]        | N | Y | N | Y | Y | Y | MCRA                       |
| HF | 9   | M | DCM   | VAD/<br>50 | N | N | N | N | N | N | AA, ASA                    |
| HF | 12  | F | DCM   | 25         | N | Y | N | Y | N | Y | ASA                        |
| HF | 24  | M | DCM   | 15         | Y | N | N | N | N | Y | VASODIL                    |
| HF | 31  | M | DCM   | 26         | N | N | N | Y | Y | N | ASA                        |
| HF | 44  | F | DCM   | VAD/<br>NA | Y | N | N | N | N | N | CCB                        |
| HF | 45  | M | DCM   | 26         | N | N | N | N | Y | Y | MCRA, AA                   |
| HF | 46  | F | DCM   | 16         | N | N | Y | N | Y | Y | MCRA, ASA                  |
| HF | 51  | F | DCM   | 10         | Y | N | N | N | N | N |                            |
| HF | 53  | M | DCM   | 21         | N | N | N | Y | Y | N | ASA                        |
| HF | 54  | F | DCM   | 15         | N | N | N | N | N | Y | PDE5i,<br>MCRA,<br>VASODIL |

|    |    |   |     |    |   |   |   |   |   |   |              |
|----|----|---|-----|----|---|---|---|---|---|---|--------------|
| HF | 60 | F | DCM | 23 | N | N | N | N | N | Y | ARB,<br>MCRA |
| HF | 63 | M | DCM | 28 | N | N | N | Y | Y | Y | MCRA         |

*\*Abbreviations for Failure Status column:* NF, nonfailing; HF, heart failure.

*Abbreviations for Sex column:* M, male; F, female

*Abbreviation for Diagnosis column:* DCM, dilated cardiomyopathy.

*Abbreviations for EF [FS] column:* EF, ejection fraction (%); FS, fractional shortening (%) shown in brackets; NA, not available; VAD, ventricular assist device.

*Abbreviations for Medications columns:* AA, anti-arrhythmic; ACE-I, angiotensin converting enzyme inhibitor; ARB, angiotensin receptor blocker; ASA, aspirin; BB, beta blocker; CCB, calcium channel blocker; DDAVP, desmopressin; MCRA, mineralocorticoid receptor antagonist; N, not taking medication; NA, not available; PDE5i, phosphodiesterase 5 inhibitor; PGE, prostaglandin E; T4, thyroid replacement; STAT, statin; VASOPR, vasopressor; VASODIL, vasodilator; VP, vasopressin; Y, taking medication.

# Online Figure 1

Mitochondria Functional Preservation with BIOPS

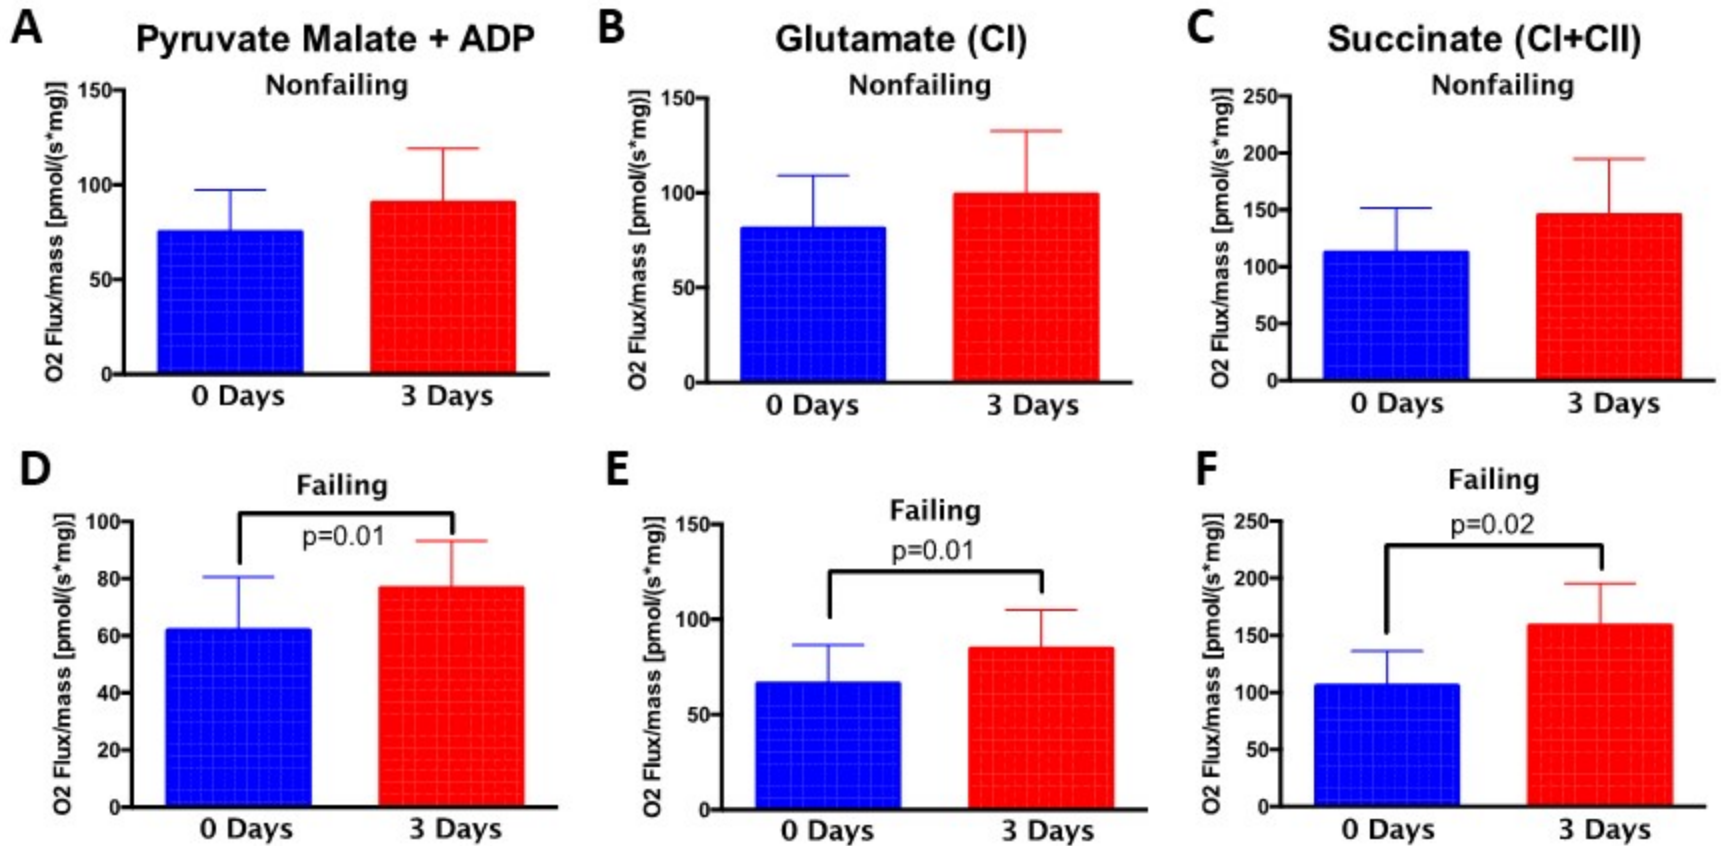

# Online Figure 2

High Resolution Respirometry Traces

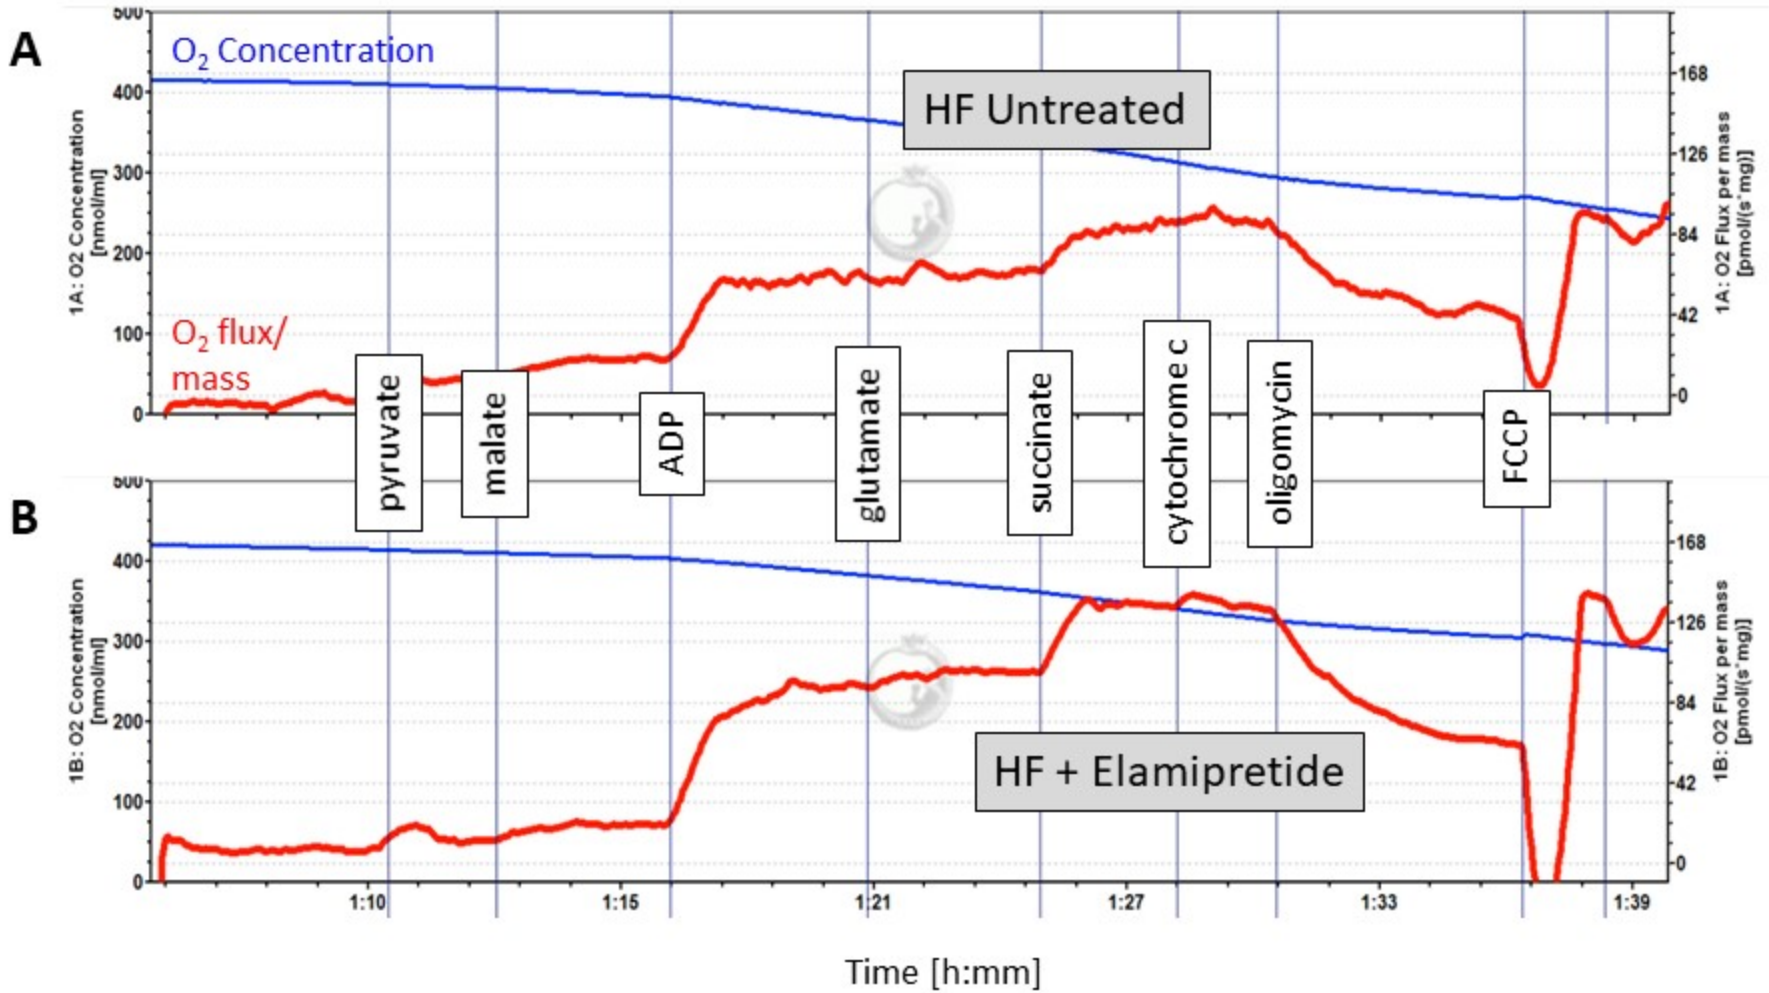

# Online Figure 3

High Resolution Respirometry of Treated and Untreated Heart Fibers through Complex II

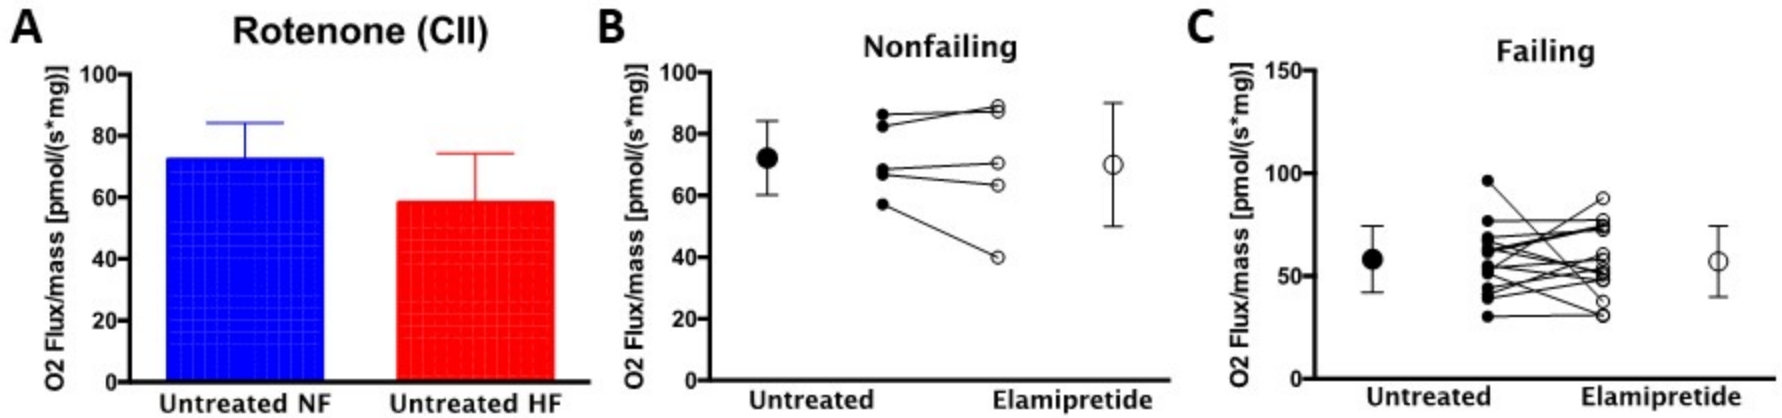

Supplement: mmc1.pdf [file mmc1.pdf]
